# Supplementary material for: Identification of Five Hub Genes Based on Single-Cell RNA Sequencing Data and Network Pharmacology in Patients With Acute Myocardial Infarction
Source: Frontiers journal article supplement (doi:10.3389/fpubh.2022.894129), 2022-06-09

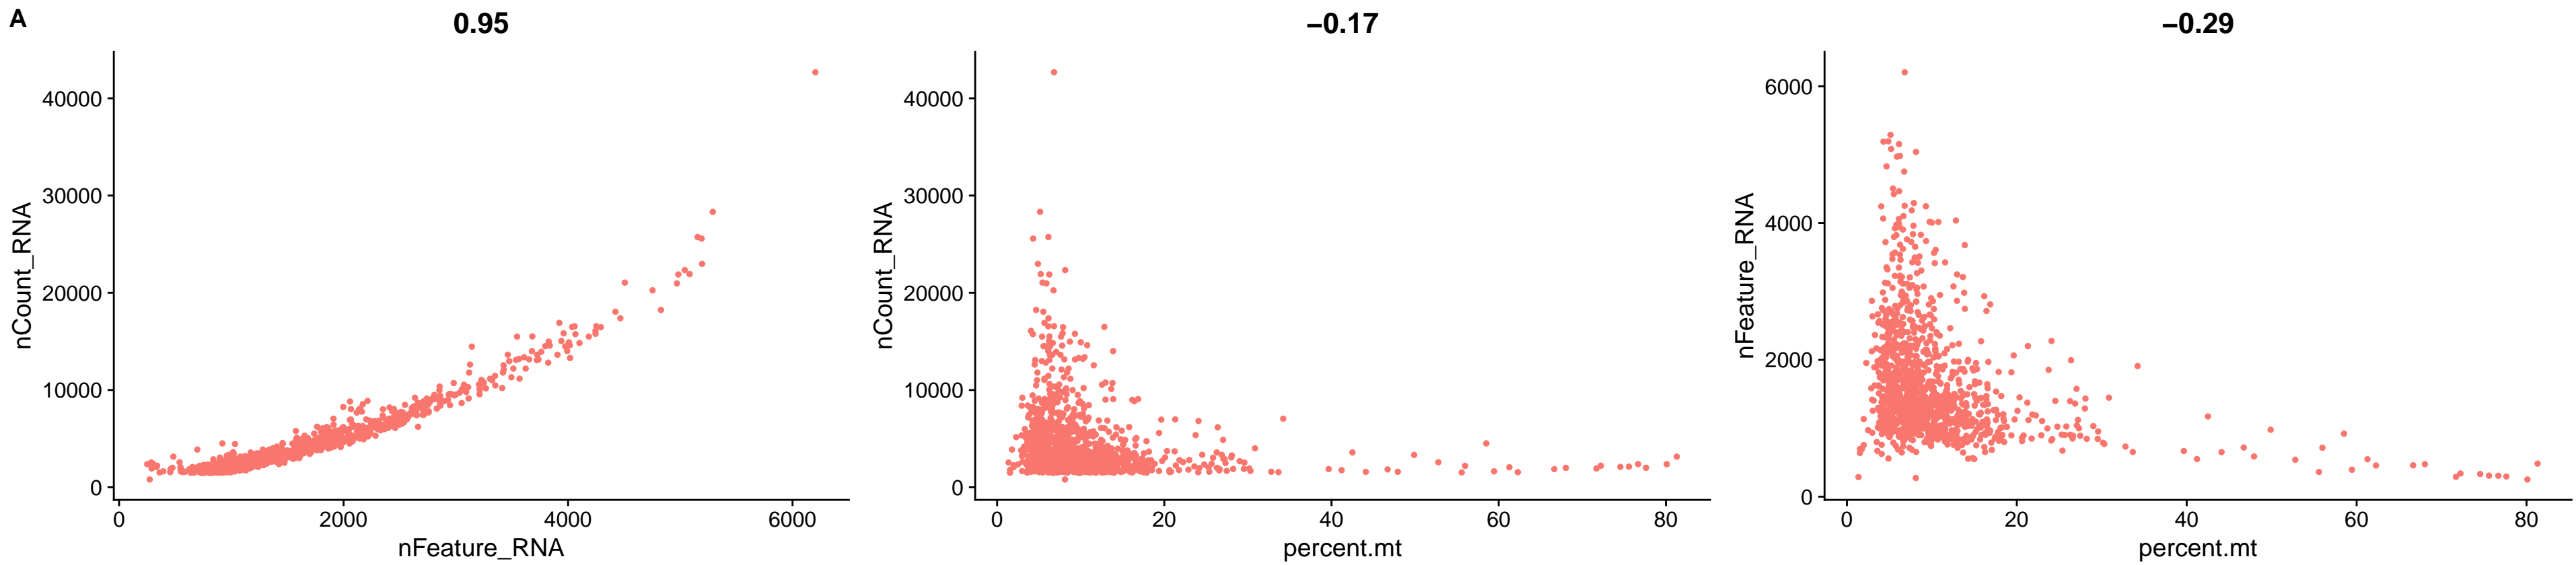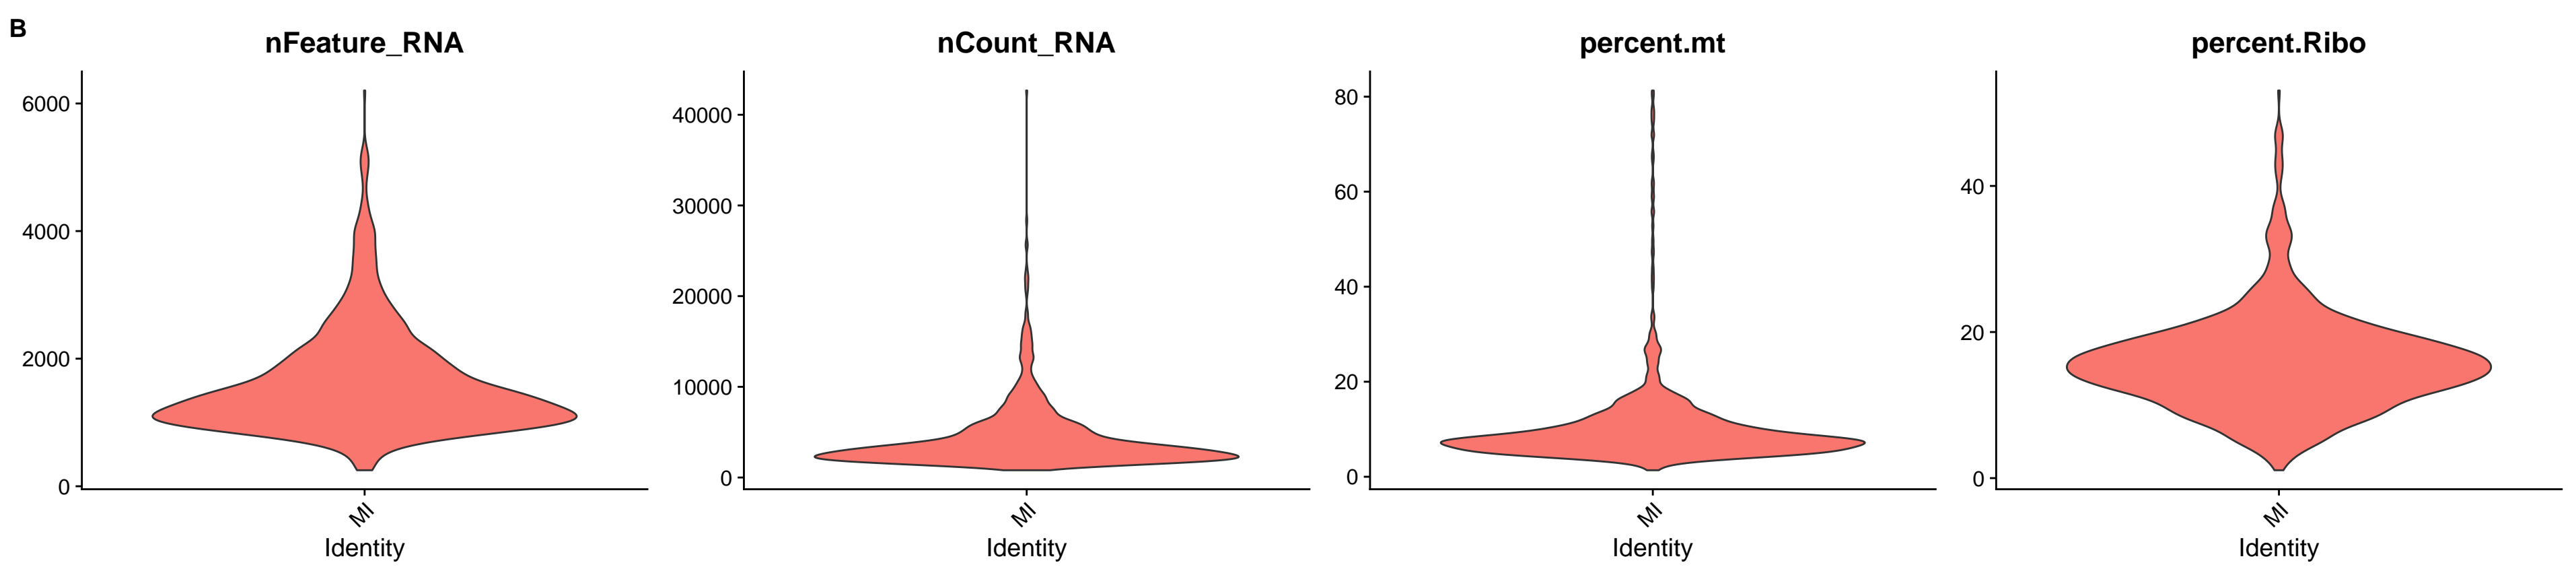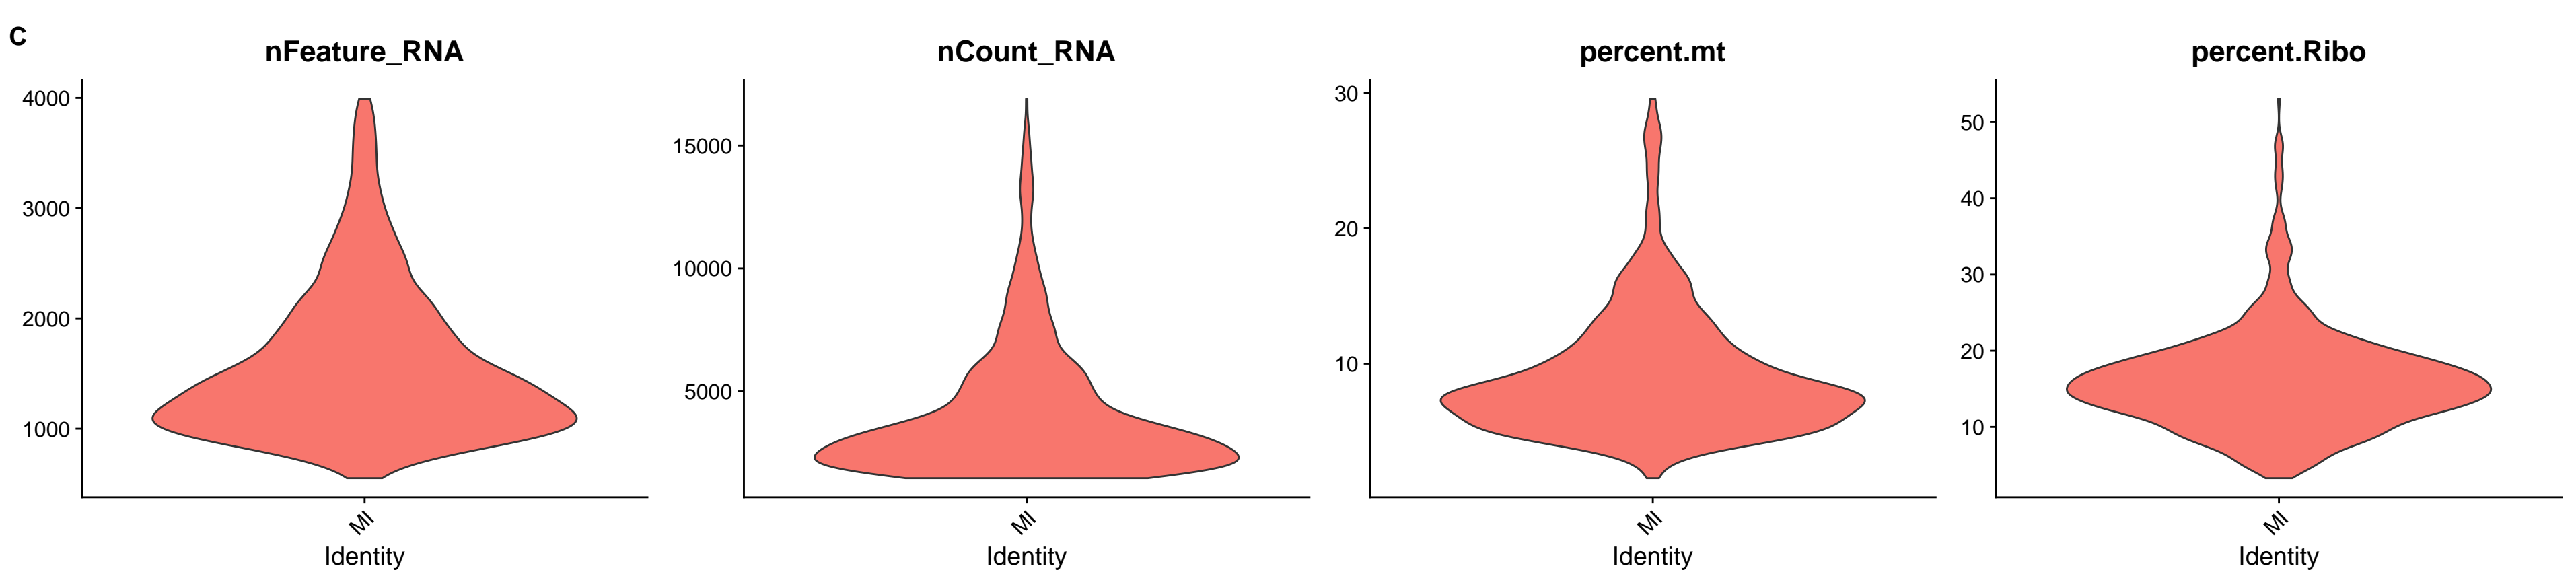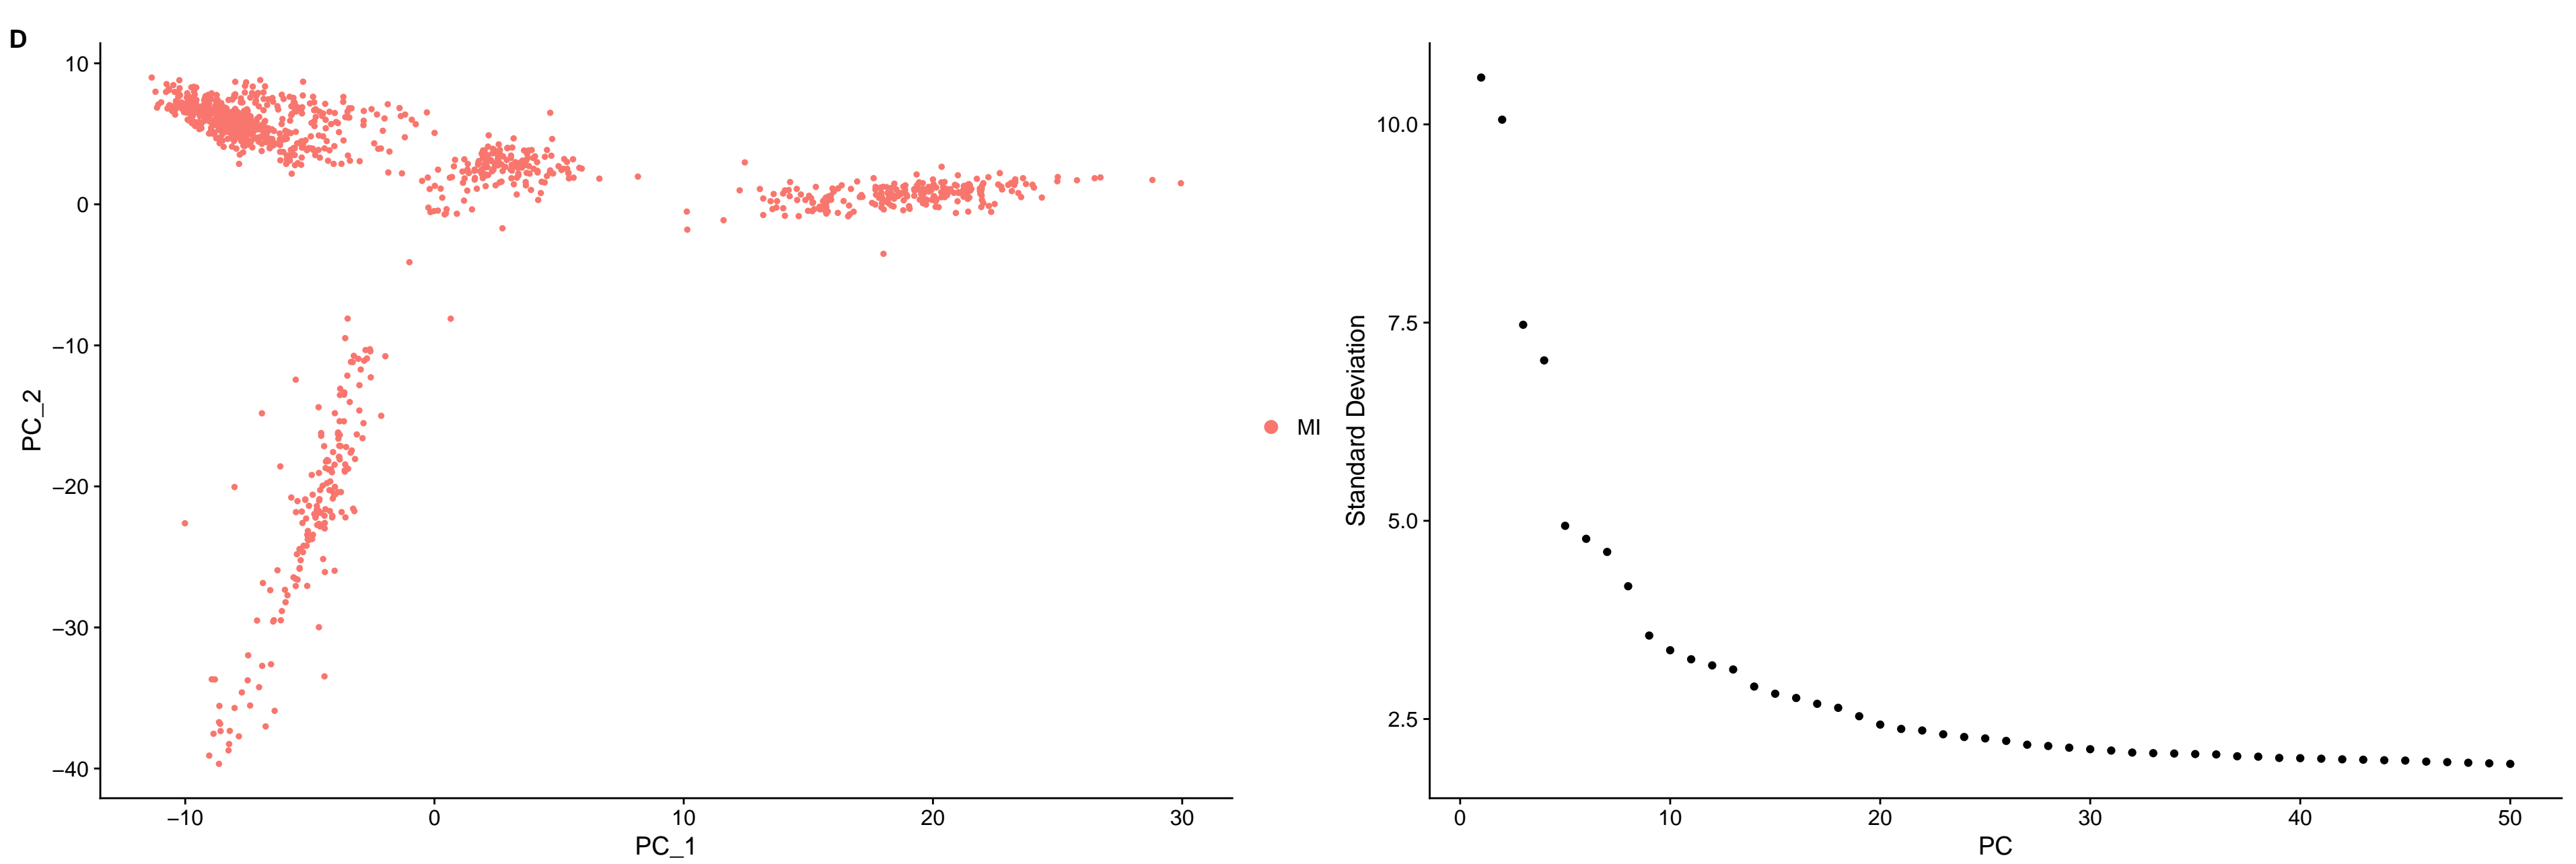

Supplement: Image_2.pdf [file Image_2.pdf]
